# Supplementary material
Source: PubMed Central journal article supplement (PMC7480940)
Supplement: hyp-76-1104-s001.pdf [file hyp-76-1104-s001.pdf]

## Data Supplement

### **Redefining cardiac biomarkers in predicting mortality and adverse outcomes of inpatients with COVID-19**

Juan-Juan Qin\*, MD<sup>1-3</sup>; Xu Cheng\*, PhD<sup>2,3</sup>; Feng Zhou\*, PhD<sup>1,4</sup>; Fang Lei\*, MS<sup>1,3</sup>; Gauri Akolkar, MD<sup>5</sup>; Jingjing Cai, MD<sup>6</sup>; Xiao-Jing Zhang, PhD<sup>2,3</sup>; Alice Blet, MD<sup>5</sup>; Jing Xie, MD<sup>2</sup>; Peng Zhang, PhD<sup>2,4</sup>; Ye-Mao Liu, PhD<sup>2,3</sup>; Zizhen Huang, MS<sup>1,3</sup>; Ling-Ping Zhao, MS<sup>3</sup>; Lijin Lin, MS<sup>2,3</sup>; Meng Xia, MS<sup>3</sup>; Ming-Ming Chen, MS<sup>2,3</sup>; Xiaohui Song, MS<sup>1,3</sup>; Liangjie Bai, MS<sup>3</sup>; Ze Chen, MS<sup>1,3</sup>; Xingyuan Zhang, MS<sup>1,3</sup>; Da Xiang, MS<sup>3</sup>; Jing Chen, DrPh, MS<sup>3</sup>; Qingbo Xu, PhD<sup>7</sup>; Xinliang Ma, PhD<sup>8</sup>; Rhian M. Touyz, MD<sup>9</sup>; Chen Gao, MD<sup>10</sup>; Haitao Wang, MD<sup>11</sup>; Liming Liu, MD<sup>12</sup>; Weiming Mao, MD<sup>13</sup>; Pengcheng Luo, MD<sup>14</sup>; Youqin Yan, MD<sup>15</sup>; Ping Ye, MD<sup>16</sup>; Manhua Chen, MD<sup>16</sup>; Guohua Chen, MD<sup>17</sup>; Lihua Zhu, MD<sup>2,3</sup>; Zhi-Gang She, MD<sup>2,3</sup>; Xiaodong Huang, MD<sup>18</sup>; Yufeng Yuan, MD<sup>11</sup>; Bing-Hong Zhang, MD<sup>19</sup>; Yibin Wang, PhD<sup>10</sup>; Peter P. Liu, PhD<sup>5</sup>; Hongliang Li, PhD, MD<sup>1-4</sup>

1. Department of Cardiology, Zhongnan Hospital of Wuhan University; Basic Medical School, Wuhan University, Wuhan, China;
2. Department of Cardiology, Renmin Hospital of Wuhan University, Wuhan, China;
3. Institute of Model Animal of Wuhan University, Wuhan, China;
4. Medical Science Research Center, Zhongnan Hospital of Wuhan University, Wuhan, China;
5. Division of Cardiology, Department of Medicine, University of Ottawa Heart Institute, Ottawa, Ontario, Canada
6. Department of Cardiology, The Third Xiangya Hospital, Central South University, Changsha, China;
7. Centre for Clinic Pharmacology, The William Harvey Research Institute, Queen Mary University of London, UK;
8. Department of Emergency Medicine, Thomas Jefferson University, Philadelphia, Pennsylvania, PA 19004, USA
9. Institute of Cardiovascular and Medical Sciences, BHF Glasgow Cardiovascular Research Centre, University of Glasgow, Glasgow, UK;
10. Department of Anesthesiology, Cardiovascular Research Laboratories, David Geffen School of Medicine, University of California, Los Angeles, USA;
11. Department of Hepatobiliary and Pancreatic Surgery, Zhongnan Hospital of Wuhan University, Wuhan;
12. Department of general surgery, Ezhou Central Hospital, Wuhan, China;

13. Department of general surgery, Huanggang Central Hospital, Wuhan, China;
14. Department of Urology, Wuhan Third Hospital & Tongren Hospital of Wuhan University, Wuhan, China;
15. Infections Department, Wuhan Seventh Hospital, Wuhan, China;
16. Department of Cardiology, The Central Hospital of Wuhan, Tongji Medical College, Huazhong University of Science and Technology, Wuhan, China;
17. Department of Neurology, Wuhan First Hospital / Wuhan Hospital of Traditional Chinese and Western Medicine, Wuhan, Hubei, China.
18. Department of Gastroenterology, Wuhan Third Hospital & Tongren Hospital of Wuhan University, Wuhan, China;
19. Departments of Neonatology, Renmin Hospital of Wuhan University, Wuhan, China;

\*These authors contributed equally.

**Correspondence to:**

**Prof Peter P. Liu**

Division of Cardiology, Department of Medicine, University of Ottawa Heart Institute, 40 Ruskin Street, Ottawa, Ontario K1Y 4W7, Canada; Tel: 613-798-5555; Email: peter.liu@utoronto.ca OR pliu@ottawaheart.ca

**Prof Yibin Wang**

Department of Anesthesiology, Cardiovascular Research Laboratories, David Geffen School of Medicine, University of California, Los Angeles, USA; Tel: 310-206-5197; Email: yibinwang@mednet.ucla.edu

**Prof Hongliang Li**

Department of Cardiology, Zhongnan Hospital of Wuhan University, Institute of Model Animal of Wuhan University, 169 Donghu Road, Wuhan 430071, China; Tel/Fax: 86-27-68759302; Email: lihl@whu.edu.cn

**Online Table S1. Laboratory examinations of patients with COVID-19 at admission.**

| <b>Parameters</b>                    | <b>With biomarkers<br/>(N = 3219)</b> | <b>Without biomarkers<br/>(N = 2814)</b> | <b>P value</b> |
|--------------------------------------|---------------------------------------|------------------------------------------|----------------|
| Neutrophil count increase,<br>n/N(%) | 447/3199(14.0)                        | 250/2169(11.5)                           | 0.010          |
| Lymphocyte count decrease,<br>n/N(%) | 1407/3200(44.0)                       | 639/2169(29.5)                           | <0.001         |
| CRP increase, n/N(%)                 | 1405/2393(58.7)                       | 406/1068(38.0)                           | <0.001         |
| AST increase, n/N(%)                 | 696/3112(22.4)                        | 273/1887(14.5)                           | <0.001         |
| Creatinine increase, n/N(%)          | 239/2982(8.0)                         | 106/2025(5.2)                            | <0.001         |
| Glucose increase, n/N(%)             | 1225/2990(41.0)                       | 531/1855(28.6)                           | <0.001         |
| D-dimer increase, n/N(%)             | 1114/2879(38.7)                       | 643/1595(40.3)                           | 0.303          |
| Dyslipidemia, n/N(%)                 | 1481/2521(58.8)                       | 727/1747(41.6)                           | <0.001         |
| SpO2 < 90%, n/N(%)                   | 117/2103(5.6)                         | 75/2115(3.6)                             | 0.002          |

CRP, C-reactive protein; AST, aspartate transaminase.

**Online Table S2. The absolute or relative values of laboratory examinations in COVID-19 patients with and without myocardial biomarker measurement.**

| <b>Parameters</b>                            | <b>With biomarkers<br/>(N = 3219)</b> | <b>Without biomarkers<br/>(N = 2814)</b> | <b>P value</b> |
|----------------------------------------------|---------------------------------------|------------------------------------------|----------------|
| <b>Laboratory examinations, median (IQR)</b> |                                       |                                          |                |
| Neutrophil count (10 <sup>9</sup> /L)        | 3.3(2.4-4.9)                          | 3.4(2.4-4.6)                             | 0.972          |
| CRP (mg/L)                                   | 13.2(5-50.6)                          | 5.0(2.2-20.07)                           | <0.001         |
| AST (U/L)                                    | 25.0(18.0-37.25)                      | 21.0(16.0-30.9)                          | <0.001         |
| D-dimer (relative for ULN)                   | 0.7(0.4-1.72)                         | 0.5(0.1-1.4)                             | <0.001         |
| Hs-cTnI (relative for ULN)                   | 0.1(0.1-0.3)                          | -                                        |                |
| CK-MB (relative for ULN)                     | 0.4(0.2-0.5)                          | -                                        |                |
| BNP or NT-proBNP<br>(relative for ULN)       | 0.2(0.1-0.4)                          | 0.3(0.1-0.8)                             | <0.001         |
| CK (relative for ULN)                        | 0.3(0.2-0.6)                          | 0.3(0.2-0.5)                             | 0.727          |
| MYO (relative for ULN)                       | 0.3(0.2-0.6)                          | 0.3(0.2-0.7)                             | 0.510          |

CRP, C-reactive protein; AST, aspartate transaminase; hs-cTnI, high-sensitivity cardiac troponin I; CK-MB, creatine phosphokinase-MB; CK, creatine phosphokinase; MYO, myoglobin; BNP, brain natriuretic peptide; NT-proBNP, NT-proB-type natriuretic peptide.

**Online Table S3. The Normal Range of Serum D-dimer, Hs-cTnI, CK-MB, BNP, NT-proBNP, CK, MYO Test in Study Hospitals**

| Site | D-dimer<br>(mg/L) | Hs-cTnI<br>(ng/mL)             | CK-MB                           | BNP<br>(pg/mL)  | NT-proBNP<br>(pg/mL)                 | CK<br>(U/L)                           | MYO<br>(ng/mL)           |
|------|-------------------|--------------------------------|---------------------------------|-----------------|--------------------------------------|---------------------------------------|--------------------------|
| 1    | 0-0.5             | 0-26.2                         | 0-25(U/L)                       | 0-100           | 0-450/<br>0-900/<br>0-1800           | 0-171/ 0-145                          | 0-140.1                  |
| 2    | 0-0.55            | 0-0.04                         | 0-5(ng/mL)                      | -               | 0-450/<br>0-900/<br>0-1800           | 50-310/<br>40-200                     | 0-110                    |
| 3    | 0-0.5             | 0-0.04/<br>0-0.03              | 0-25(U/L)                       | 2-121           | -                                    | 30-180                                | 0-110                    |
| 4    | 0-1               | 0-0.1/<br>0-0.4                | 0-5.9(ng/mL)/<br>0-25(U/L)      | -               | 0-900                                | 50-310/ 40-<br>200                    | 0-100                    |
| 5    | 0-1               | 0-0.09/<br>0-0.03/<br>0-0.0156 | 0-25(U/L)/<br>0-24(U/L)         | 0-100/<br>0-125 | -                                    | 26-140/<br>38-174/<br>0-170/<br>0-190 | 17.4-105.5/<br>14.3-65.8 |
| 6    | 0-0.243           | 0-0.1                          | 0-6.22(ng/mL)                   | -               | 0-222                                | 50-310/<br>40-200                     | 7.4-105.7                |
| 7    | 0-0.55            | 0-0.04                         | 0-4.97(ng/mL)/<br>0-6.36(ng/mL) | 0-100           | -                                    | 0-145/ 0-171                          | 0-80/ 0-65               |
| 8    | 0-0.55/<br>0-1    | 0-0.026                        | 0-24(U/L)                       |                 | 0-300/<br>0-450/<br>0-900/<br>0-1800 | 30-120                                | 0-154.9                  |
| 9    | 0-0.243           | 0-0.5                          | 0-25(U/L)/<br>0.5-6.3(ng/mL)    | 0-100           | 0-300                                | 0-190                                 | 1.5-70/ 0-<br>100        |

**Online Table S4. Akaike's Information Criterion (AIC) of univariate logistic regression models**

| <b>Variables</b>             | <b>AIC</b> | <b>-2log-likelihood</b> | <b>P value</b> |
|------------------------------|------------|-------------------------|----------------|
| Hs-cTnI increase             | 634.780    | -315.390                | <0.001         |
| (NT-Pro)BNP increase         | 846.171    | -421.086                | <0.001         |
| MYO increase                 | 919.554    | -457.777                | <0.001         |
| SpO2 < 95%                   | 1088.586   | -542.293                | <0.001         |
| CK increase                  | 1141.665   | -568.832                | <0.001         |
| Neutrophil count increase    | 1287.439   | -641.719                | <0.001         |
| CRP increase                 | 1289.833   | -642.917                | <0.001         |
| CK-MB increase               | 1306.155   | -651.078                | <0.001         |
| D-dimer increase             | 1309.915   | -652.958                | <0.001         |
| Lymphocyte count decrease    | 1332.133   | -664.067                | <0.001         |
| Age                          | 1342.802   | -669.401                | <0.001         |
| AST increase                 | 1346.803   | -671.402                | <0.001         |
| Creatinine increase          | 1375.480   | -685.740                | <0.001         |
| With hypertension            | 1425.938   | -710.969                | <0.001         |
| Gender                       | 1433.874   | -714.937                | <0.001         |
| With coronary heart disease  | 1440.715   | -718.357                | <0.001         |
| With cerebrovascular disease | 1449.493   | -722.747                | <0.001         |
| With diabetes                | 1453.164   | -724.582                | <0.001         |
| Fatigue                      | 1463.075   | -729.538                | 0.238          |
| Fever                        | 1463.399   | -729.700                | 0.313          |
| SBP                          | 1463.598   | -729.799                | 0.354          |
| With COPD                    | 1464.118   | -730.059                | 0.543          |
| DBP                          | 1464.222   | -730.111                | 0.637          |

SBP, Systolic blood pressure; DBP, Diastolic blood pressure; COPD, Chronic obstructive pulmonary disease; AST, aspartate transaminase; hs-cTnI, high-sensitivity cardiac troponin I; CK-MB, creatine phosphokinase-MB; CK, creatine phosphokinase; MYO, myoglobin; BNP, brain natriuretic peptide; NT-proBNP, NT-proB-type natriuretic peptide.

**Online Table S5. The outcomes in patients with and without heart injury marker measured**

| <b>Outcomes</b>     | <b>With biomarkers<br/>(N = 3219)</b> | <b>Without biomarkers<br/>(N = 2814)</b> | <b>P value</b> |
|---------------------|---------------------------------------|------------------------------------------|----------------|
| All-cause death     | 193/3219(6.0%)                        | 107/2814(3.8%)                           | <0.001         |
| ARDS                | 430/3219(13.4%)                       | 207/2814(7.4%)                           | <0.001         |
| Heart failure       | 331/3219(10.3%)                       | 184/2814(6.5%)                           | <0.001         |
| DIC                 | 25/3219(0.8%)                         | 8/2814(0.3%)                             | 0.016          |
| Sepsis/MOF          | 102/3219(3.2%)                        | 30/2814(1.1%)                            | <0.001         |
| Acute renal failure | 96/3219(3.0%)                         | 38/2814(1.4%)                            | <0.001         |

ARDS, acute respiratory distress; DIC, disseminated intravascular coagulation; MOF, multi-organ failure.

**Online Table S6. The causes of death in patients with and without heart injury**

| <b>Causes</b>                   | <b>With heart injury<br/>(N = 126)</b> | <b>Without heart injury<br/>(N = 75)</b> | <b>P value</b> |
|---------------------------------|----------------------------------------|------------------------------------------|----------------|
| Respiratory failure, n/N(%)     | 115 (91.3)                             | 72 (96.0)                                | 0.323          |
| MODS, n/N(%)                    | 15 (11.9)                              | 5 (6.7)                                  | 0.339          |
| DIC, n/N(%)                     | 10 (7.9)                               | 2 (2.7)                                  | 0.223          |
| Cardiac arrest, n/N(%)          | 7 (5.6)                                | 4 (5.3)                                  | 1.000          |
| Hyperkalemia, n/N(%)            | 7 (5.6)                                | 1 (1.3)                                  | 0.268          |
| Heart failure , n/N(%)          | 6 (4.8)                                | 2 (2.7)                                  | 0.717          |
| Sepsis, n/N(%)                  | 3 (2.4)                                | 1 (1.3)                                  | 1.000          |
| Malignant arrhythmia,<br>n/N(%) | 3 (2.4)                                | 1 (1.3)                                  | 1.000          |

MODS, multiple organ dysfunction syndrome; DIC, disseminated intravascular coagulation.



**Online Table S7. Overall performance of increased myocardial marker levels above ULNs for predicting COVID-19 mortality**

| <b>Parameters</b>           | <b>Hs-cTnI</b>         | <b>CK-MB</b>           | <b>(NT-Pro)BNP</b>     | <b>CK</b>              | <b>MYO</b>             |
|-----------------------------|------------------------|------------------------|------------------------|------------------------|------------------------|
| N                           | 1462                   | 3120                   | 1650                   | 2534                   | 1895                   |
| Mortality                   | 98                     | 178                    | 133                    | 163                    | 148                    |
| AUC(95% CI)                 | 0.78<br>(0.73-0.84)    | 0.71<br>(0.67-0.75)    | 0.81<br>(0.78-0.85)    | 0.67<br>(0.62-0.72)    | 0.83<br>(0.80-0.86)    |
| Cutoff<br>(relative to ULN) | 1                      | 1                      | 1                      | 1                      | 1                      |
| Accuracy, %<br>(95% CI)     | 91.72<br>(90.19,93.09) | 91.25<br>(90.20,92.22) | 85.94<br>(84.17,87.58) | 86.03<br>(84.62,87.36) | 87.44<br>(85.86,88.90) |
| Sensitivity, %              | 36.74                  | 21.91                  | 42.86                  | 37.42                  | 46.62                  |
| Specificity, %              | 95.67                  | 95.45                  | 89.72                  | 89.37                  | 90.90                  |
| PPV                         | 0.38                   | 0.23                   | 0.27                   | 0.19                   | 0.30                   |
| NPV                         | 0.95                   | 0.95                   | 0.95                   | 0.95                   | 0.95                   |
| Balanced<br>accuracy        | 0.66                   | 0.59                   | 0.66                   | 0.63                   | 0.69                   |

AUC, area under the ROC curves; PPV, positive predictive value; NPV, negative predictive value; hs-cTnI, high-sensitivity cardiac troponin I; CK-MB, creatine phosphokinase-MB; CK, creatine phosphokinase; MYO, myoglobin; BNP, brain natriuretic peptide; NT-proBNP, NT-proB-type natriuretic peptide.

**Online Table S8. Associations of cardiac injury markers above cutoffs with 28-day all-cause mortality of COVID-19 in patients divided by cutoffs and upper limit of normal**

|             | Crude              |                | Model I            |                | Model II         |                |
|-------------|--------------------|----------------|--------------------|----------------|------------------|----------------|
|             | HR(95% CI)         | <i>P</i> value | HR(95% CI)         | <i>P</i> value | HR(95% CI)       | <i>P</i> value |
| Hs-cTnI     | 13.39(8.88, 20.20) | <0.001         | 10.68(6.87, 16.59) | <0.001         | 4.74(3.05,7.35)  | <0.001         |
| CK-MB       | 3.48(2.58, 4.71)   | <0.001         | 3.63(2.60, 5.06)   | <0.001         | 2.17(1.56,3.01)  | <0.001         |
| (NT-Pro)BNP | 14.33(7.73, 26.56) | <0.001         | 12.01(6.39, 22.58) | <0.001         | 5.67(2.97,10.82) | <0.001         |
| CK          | 2.91(2.11, 4.01)   | <0.001         | 2.70(1.92, 3.81)   | <0.001         | 1.80(1.28,2.53)  | <0.001         |
| Myoglobin   | 7.32(5.07, 10.59)  | <0.001         | 5.00(3.37, 7.42)   | <0.001         | 2.74(1.82,4.13)  | <0.001         |
| CRP         | 7.73(4.91,12.16)   | <0.001         | 6.63(4.08, 10.76)  | <0.001         | 1.65(0.98,2.77)  | 0.059          |
| D-dimer     | 8.22(5.96-11.34)   | <0.001         | 6.40(4.55, 9.01)   | <0.001         | 5.55(3.32,9.30)  | <0.001         |

Model I: Adjusted for age, sex, co-existing diseases (diabetes, hypertension, coronary heart disease, and cerebrovascular disease), hospital sites (as a random effect).

Model II: Adjusted for age, sex, co-existing diseases (diabetes, hypertension, coronary heart disease, and cerebrovascular disease) and indicators of disease severity (CRP increase, Neutrophil count increase, Lymphocyte count decrease, D-dimer increase and SpO<sub>2</sub><95%), hospital sites (as a random effect).

hs-cTnI, high-sensitivity cardiac troponin I; CK-MB, creatine phosphokinase-MB; CK, creatine phosphokinase; MYO, myoglobin; BNP, brain natriuretic peptide; NT-proBNP, NT-proB-type natriuretic peptide.

**Online Table S9. Akaike's Information Criterion (AIC) of Mixed-effect Cox models**

| Variables   | AIC                  |                       |                        |
|-------------|----------------------|-----------------------|------------------------|
|             | Model I <sup>a</sup> | Model II <sup>b</sup> | Model III <sup>c</sup> |
| Hs-cTnI     | 168.110              | 160.932               | 265.221                |
| CK-MB       | 218.818              | 221.221               | 502.337                |
| (NT-Pro)BNP | 170.389              | 167.363               | 341.531                |
| CK          | 142.939              | 144.169               | 414.688                |
| Myoglobin   | 171.863              | 169.988               | 352.756                |

hs-cTnI, high-sensitivity cardiac troponin I; CK-MB, creatine phosphokinase-MB; CK, creatine phosphokinase; MYO, myoglobin; BNP, brain natriuretic peptide; NT-proBNP, NT-proB-type natriuretic peptide.

a. Adjusted for age, sex, hospital sites (as a random effect).

b. Adjusted for age, sex, hospital sites (as a random effect), co-existing diseases (diabetes, hypertension, coronary heart disease, and cerebrovascular disease).

c. Adjusted for age, sex, hospital sites (as a random effect), co-existing diseases (diabetes, hypertension, coronary heart disease, and cerebrovascular disease) and indicators of disease severity (CRP increase, Neutrophil count increase, Lymphocyte count decrease, D-dimer increase and SpO<sub>2</sub><95%).

**Online Table S10. The interaction associations of cardiac injury markers and inflammatory factors with 28-day all-cause of death in patients with COVID-19**

|                          | CRP ≤<br>Cut-off            | CRP ><br>Cut-off            | Interaction<br><i>P</i> value | D-dimer<br>≤ Cut-off        | D-dimer ><br>Cut-off        | Interaction<br><i>P</i> value |
|--------------------------|-----------------------------|-----------------------------|-------------------------------|-----------------------------|-----------------------------|-------------------------------|
|                          | aHR <sup>a</sup><br>(95%CI) | aHR <sup>a</sup><br>(95%CI) |                               | aHR <sup>a</sup><br>(95%CI) | aHR <sup>a</sup><br>(95%CI) |                               |
| CK-MB ≤ Cut-off          | Ref                         | 6.24<br>(3.17,12.28)        |                               | Ref                         | 3.82<br>(2.27,6.43)         |                               |
| CK-MB > Cut-off          | 4.44<br>(1.90,10.35)        | 21.39<br>(10.81,42.32)      | 0.588                         | 2.18<br>(1.22,3.92)         | 18.12<br>(11.09,29.58)      | 0.029                         |
| CK ≤ Cut-off             | Ref                         | 11.92<br>(5.22,27.24)       |                               | Ref                         | 7.34<br>(3.91,13.78)        |                               |
| CK > Cut-off             | 6.20<br>(2.48,15.53)        | 18.16<br>(8.00,41.19)       | 0.006                         | 3.84<br>(2.04,7.22)         | 20.10<br>(10.98,36.78)      | 0.377                         |
| MYO ≤ Cut-off            | Ref                         | 13.82<br>(4.64,41.13)       |                               | Ref                         | 5.62<br>(2.84,11.15)        |                               |
| MYO > Cut-off            | 16.06<br>(5.32,48.44)       | 41.36<br>(14.48,118.14)     | 0.007                         | 4.25<br>(2.16,8.37)         | 23.84<br>(12.89,44.10)      | 0.996                         |
| Hs-cTnI ≤ Cut-off        | Ref                         | 4.96<br>(2.27,10.85)        |                               | Ref                         | 10.58<br>(4.78,23.42)       |                               |
| Hs-cTnI > Cut-off        | 15.76<br>(5.83,42.60)       | 37.40<br>(17.15,81.54)      | 0.190                         | 14.71<br>(6.09,35.52)       | 83.72<br>(38.41,182.49)     | 0.222                         |
| (NT-Pro)BNP ≤<br>Cut-off | Ref                         | 3.51<br>(1.01,12.21)        |                               | Ref                         | 2.95<br>(0.79,11.04)        |                               |
| (NT-Pro)BNP ><br>Cut-off | 6.63<br>(2.13,20.64)        | 28.87<br>(10.26,81.24)      | 0.759                         | 6.26<br>(2.33,16.83)        | 43.96<br>(17.49,110.46)     | 0.226                         |

a. Adjusted for age, sex, hospital sites (as a random effect), co-existing diseases (diabetes, hypertension, coronary heart disease, and cerebrovascular disease).

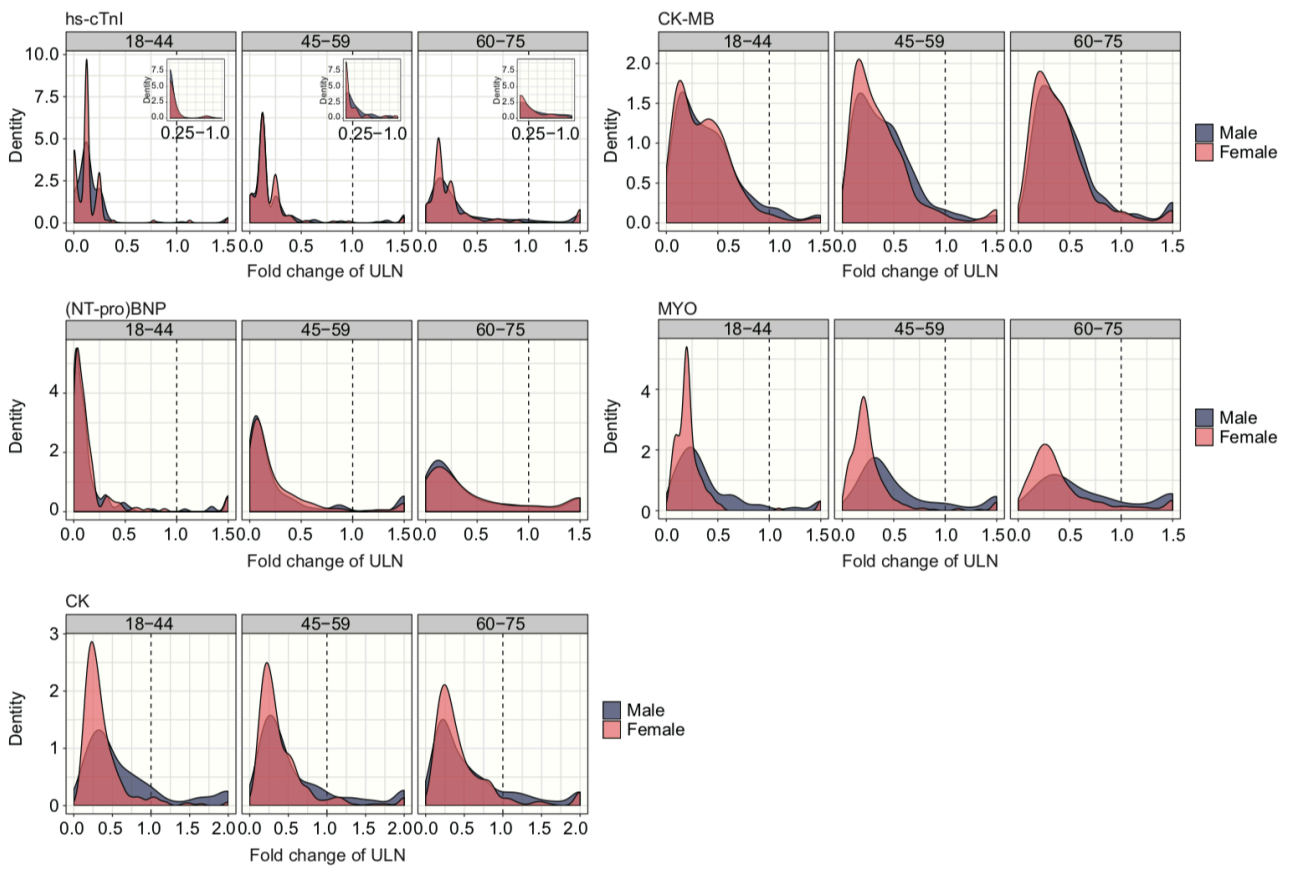

**Online Figure S1.** The distributions of serum hs-cTnI, CK-MB, (NT-pro)BNP, CK, and MYO on admission at the age brackets of 18-44, 45-59, and 60-75 years among patients with COVID-19. The x-axis represents relative contents of myocardial markers levels to their corresponding ULNs according to criteria in each hospital.

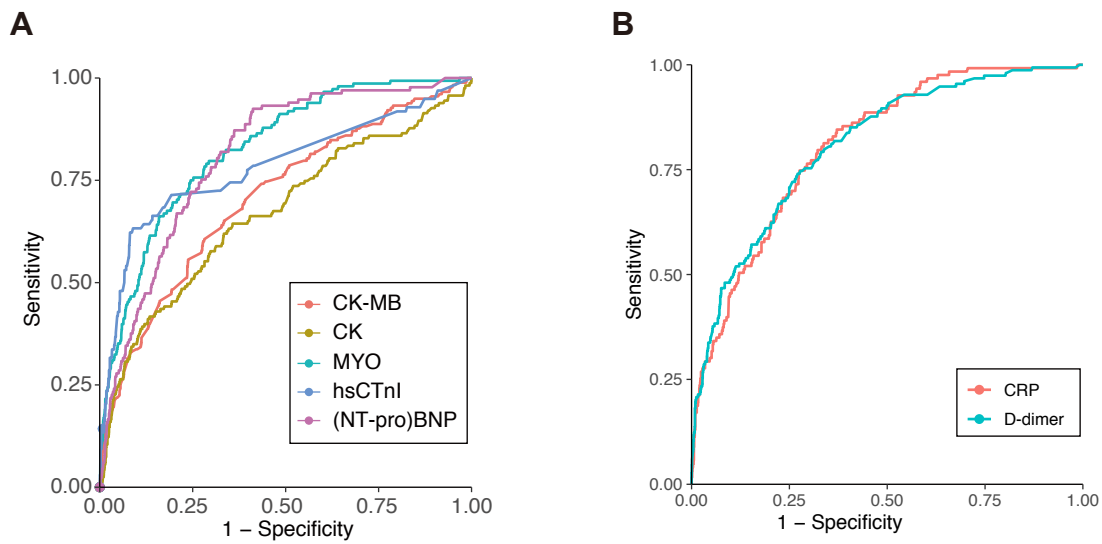

**Online Figure S2.** ROC curve showing overall performance of myocardial injury markers and inflammatory factors for identifying risk of COVID-19 mortality.

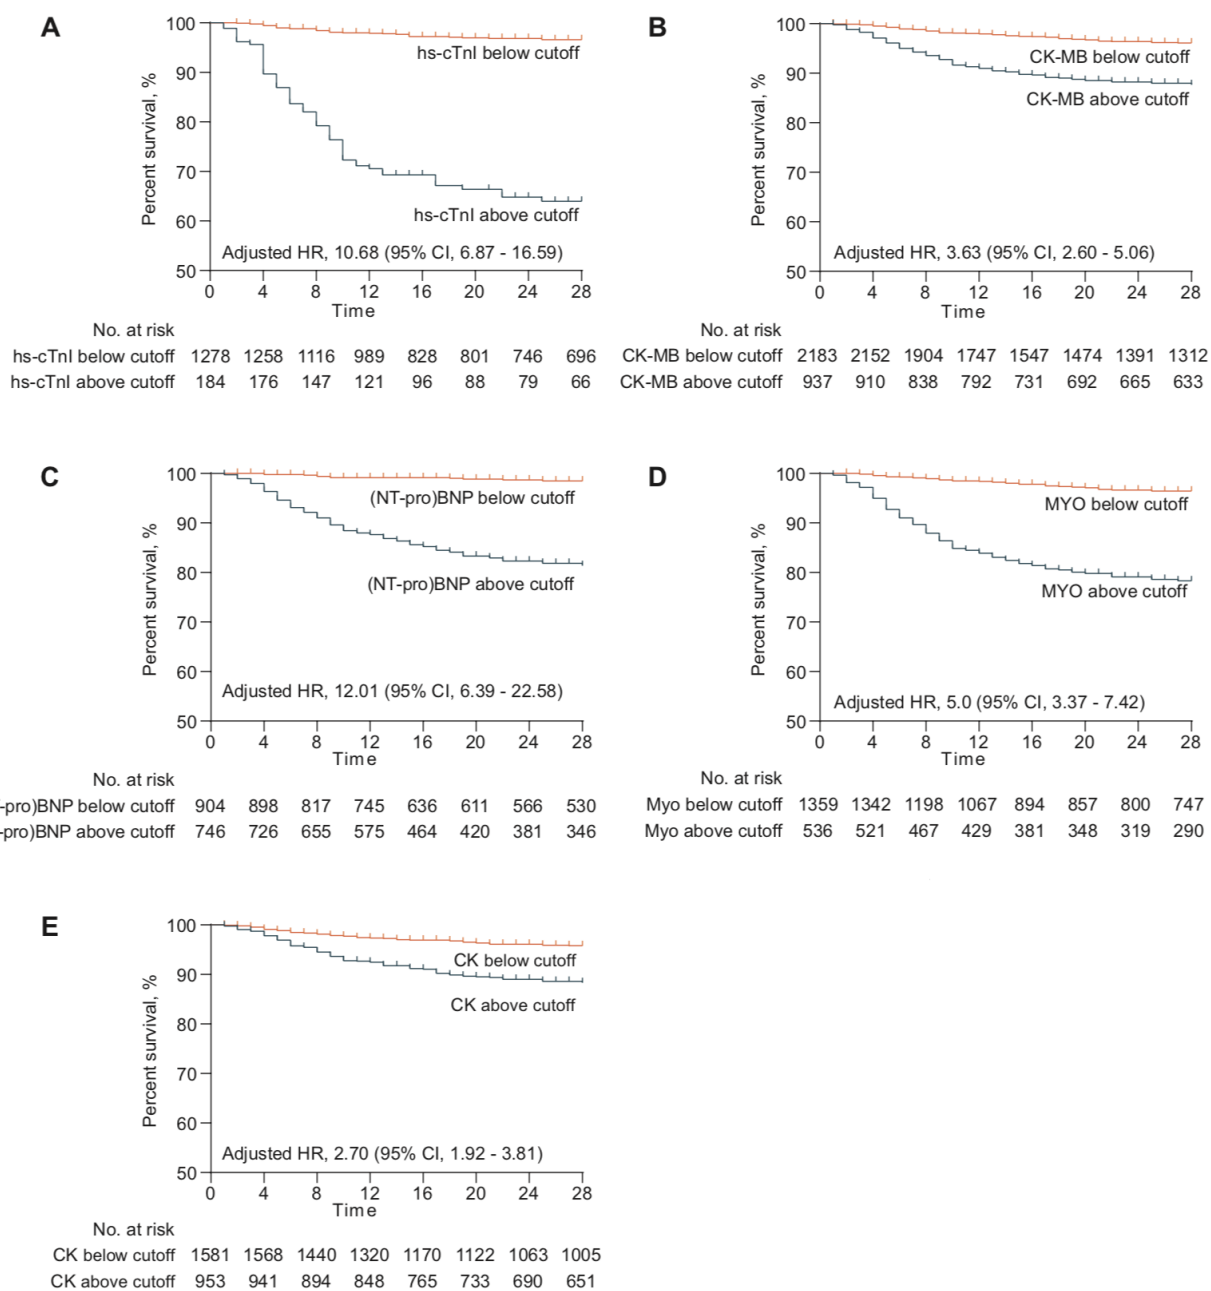

**Online Figure S3.** Kaplan-Meier Curves showing cumulative survival of COVID-19 among patients with levels of hs-cTnI (A), CK-MB (B), (NT-pro)BNP (C), MYO (D), and CK (E) above and under cutoffs.

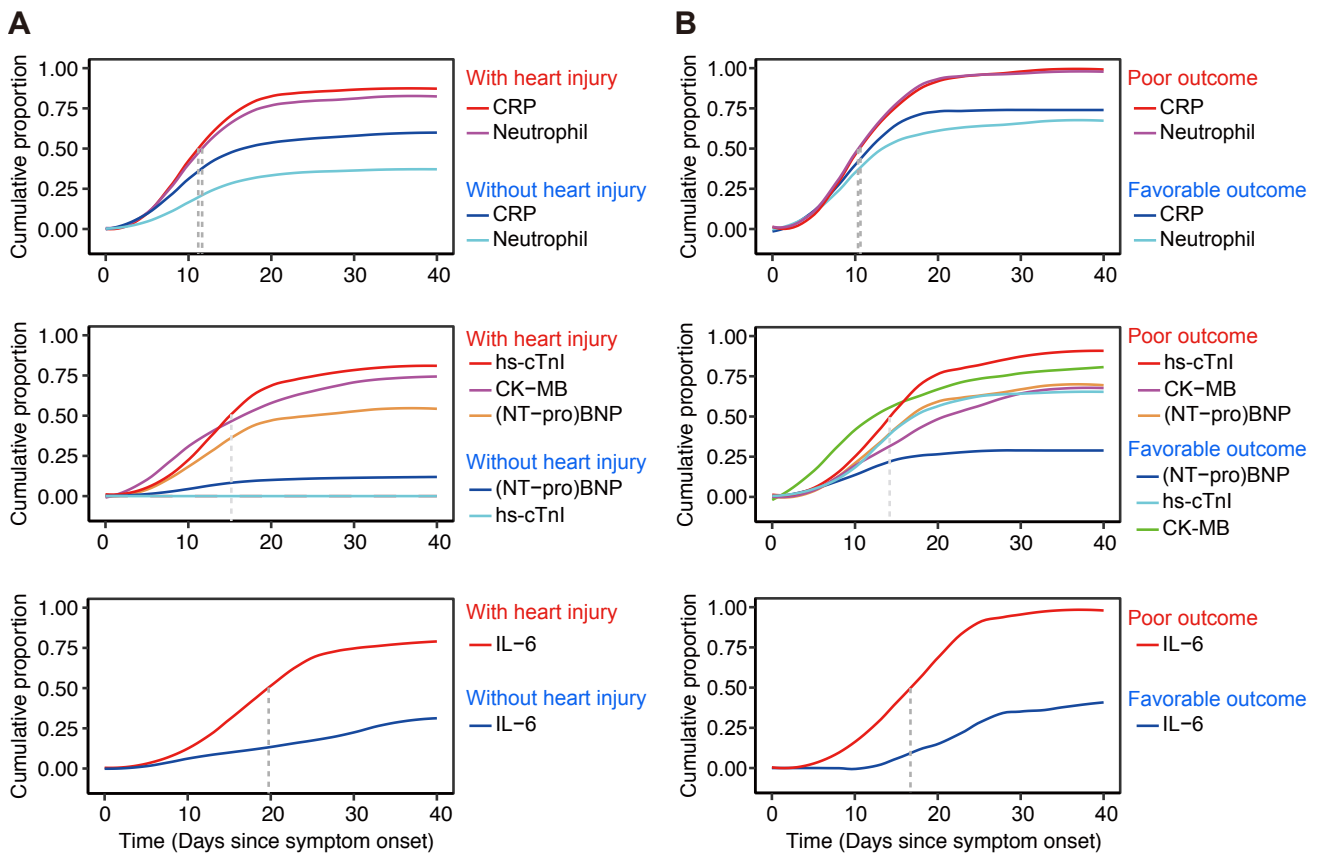

**Online Figure S4.** Trajectory and levels of cardiac biomarkers and inflammatory markers among COVID-19 patients with or without heart injury (A) and among patients with heart injury and having favorable or poor outcomes (B).



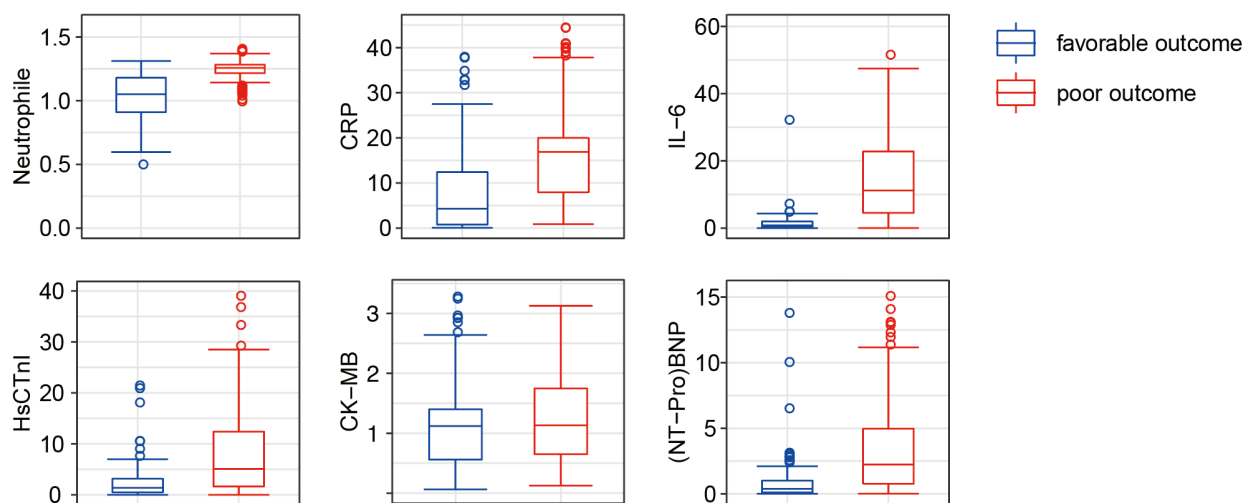

**Online Figure S5.** The peak values of serum cardiac biomarkers and inflammatory factors levels relative to their ULNs during hospitalization in patients with favorable or poor outcomes.
